# Supplementary material for: Palytoxin-Analogues Accumulation in Natural Mussel Banks during an Ostreopsis cf. ovata Bloom
Source: MDPI journal article supplement (doi:10.3390/jmse10101402), 2022-10-01
Supplement: s1 [file s1]

Table S1. Monitoring data of *Ostreopsis* cf. *ovata* abundances in the water column collected by ARPAM at the Passetto and Portonovo stations in summer/fall 2021. Data are highlighted following the Italian guidelines to protect human health in bathing waters affected by *O. cf. ovata* blooms [84]: green = routine phase ( $\leq 10,000$  cells L<sup>-1</sup>); yellow = alert phase (10,000–30,000 cells L<sup>-1</sup>); red = emergency phase ( $> 30,000$  cells L<sup>-1</sup>).

| Date<br>Station  | 07-Jul<br>(cells L <sup>-1</sup> ) | 27-Jul<br>(cells L <sup>-1</sup> ) | 09-Aug<br>(cells L <sup>-1</sup> ) | 17-Aug<br>(cells L <sup>-1</sup> ) | 06-Sep<br>(cells L <sup>-1</sup> ) | 09-Sep<br>(cells L <sup>-1</sup> ) | 15-Sep<br>(cells L <sup>-1</sup> ) | 23-Sep<br>(cells L <sup>-1</sup> ) | 29-Sep<br>(cells L <sup>-1</sup> ) |
|------------------|------------------------------------|------------------------------------|------------------------------------|------------------------------------|------------------------------------|------------------------------------|------------------------------------|------------------------------------|------------------------------------|
| <b>Passetto</b>  | <120                               | <120                               | <120                               | <120                               | 17,680                             | 21,360                             | 1,239,719                          | 9,920                              | 2,880                              |
| <b>Portonovo</b> | <120                               | <120                               | <120                               | <120                               | 920                                | 28,800                             | 17,520                             | 5,000                              | 1,120                              |

## Reference

1. Funari, E.; Manganelli, M.; Testai, E. *Ostreopsis* cf. *ovata* blooms in coastal water: Italian guidelines to assess and manage the risk associated to bathing waters and recreational activities. *Harmful Algae* **2015**, *50*, 45–56. <https://doi.org/10.1016/j.hal.2015.10.008>.
